# Supplementary material for: Ibuprofen results in alterations of human fetal testis development
Source: PubMed Central journal article supplement (PMC5345102; doi:10.1038/srep44184), 2017-03-10
Supplement: srep44184-s1.pdf [file srep44184-s1.pdf]

## **Ibuprofen results in alterations of human fetal testis development**

Millissia Ben Maamar<sup>1</sup>, Laurianne Lesné<sup>1</sup>, Kristin Hennig<sup>2</sup>, Christèle Desdoits-Lethimonier<sup>1</sup>, Karen R. Kilcoyne<sup>3</sup>, Isabelle Coiffec<sup>1</sup>, Antoine D. Rolland<sup>1</sup>, Cécile Chevrier<sup>1</sup>, David M. Kristensen<sup>4</sup>, Vincent Lavoué<sup>5</sup>, Jean-Philippe Antignac<sup>2</sup>, Bruno Le Bizec<sup>2</sup>, Nathalie Dejuccq-Rainsford<sup>1</sup>, Rod T. Mitchell<sup>3</sup>, Séverine Mazaud-Guittot<sup>1</sup>, Bernard Jégou<sup>1,6\*</sup>

<sup>1</sup>Institut national de la santé et de la recherche médicale (Inserm), Institut de recherche en santé, environnement et travail (Irset – Inserm UMR 1085), 9 Avenue Léon Bernard, F-35000 RENNES, France. Université de Rennes 1, F-35043 RENNES, France.

<sup>2</sup>LUNAM Université, Oniris, USC INRA 1329, Laboratoire d'Etude des Résidus et Contaminants dans les Aliments (LABERCA), Nantes, F-44307, France.

<sup>3</sup>MRC Centre for Reproductive Health, University of Edinburgh, Queens Medical Research Institute, 47 Little France Crescent, Edinburgh, EH16 4TJ.

<sup>4</sup>Laboratorium of Genomic and Molecular Biomedicine, Department of Biology, University of Copenhagen, Ole Maaløes Vej 5, DK-2200 Copenhagen N, Denmark.

<sup>5</sup>CHU de Rennes, Service de Gynécologie, Hôpital Sud, 16, boulevard de Bulgarie, F-35700 Rennes, France; Université de Rennes 1, Faculté de Médecine, F-35043 RENNES, France.

<sup>6</sup>Ecole des hautes études en santé publique (EHESP), Avenue Léon Bernard, F-35043 RENNES, France.

**\*To whom correspondence should be addressed: [bernard.jegou@inserm.fr](mailto:bernard.jegou@inserm.fr)**

**Figure S1.**

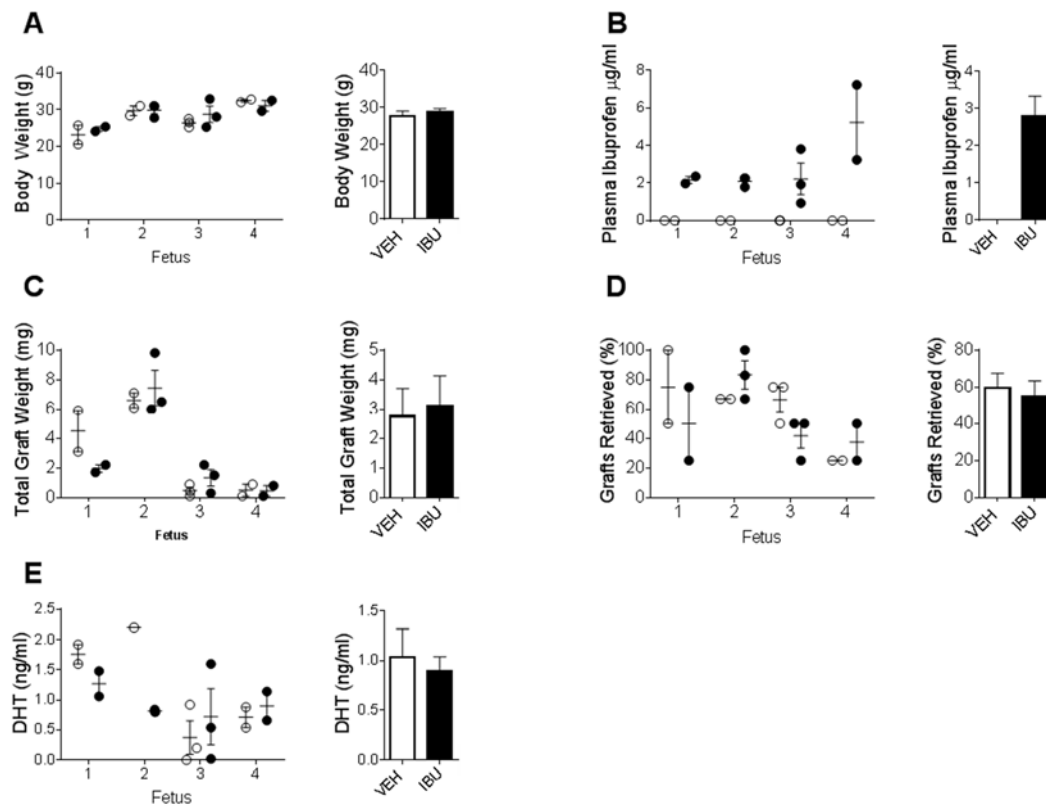

**Figure S1.** Body weight (A), Grafts retrieved (B) and Total graft weight (C) for individual host mice carrying human fetal testis xenografts (14-17 GW; n=4) exposed for 7d to vehicle (corn oil; open circles) or ibuprofen (10 mg/kg 3 times daily; closed circles); with overall mean  $\pm$  SEM for vehicle (white bars) and ibuprofen (black bars). (D) Plasma ibuprofen concentration in vehicle (open circles) and ibuprofen (closed circles) exposed host mice. Data analyzed by two-way ANOVA.
